# Supplementary material for: Eggshell-derived hydroxyapatite-alkali-activated waste glass composite for fluoride sequestration: characteristics and mechanistic insights and process optimization
Source: Royal Society of Chemistry journal article supplement (doi:10.1039/d6ra00457a), 2026-04-16
Supplement: d6ra00457a1.pdf [file d6ra00457a1.pdf]

## Supplementary Information

### Eggshell-Derived Hydroxyapatite–Alkali-Activated Waste Glass Composite for Fluoride Sequestration: Characteristics and Mechanistic Insights

Bennet Edem Akorley<sup>1,2\*</sup>, Ohene B. Apea<sup>1</sup>, Girum Ayalneh, Tiruye<sup>2§</sup>

<sup>1</sup>Department of Applied Chemistry, C. K. Tedam University of Technology and Applied Sciences

<sup>2</sup>Center for Materials Science and Engineering, College of Natural and Computational Sciences, Addis Ababa University, P.O.Box 1176, Addis Ababa, Ethiopia

Corresponding author: [§girum.ayalneh@aau.edu.et](mailto:girum.ayalneh@aau.edu.et) and [\\*bennetakorley@gmail.com](mailto:bennetakorley@gmail.com)

Table S1. Benchmark comparison between CaO-rich AAC-P@Ca and hydroxyapatite-modified AAC-P@HAp

| Parameter                                                        | AAC-P@Ca (Akorley et al., 2026 <sup>(1)</sup> )                               | AAC-P@HAp (This study)                                                     |
|------------------------------------------------------------------|-------------------------------------------------------------------------------|----------------------------------------------------------------------------|
| Calcium phase                                                    | Free / reactive CaO-rich phase                                                | Crystalline Ca-PO <sub>4</sub> phase (hydroxyapatite)                      |
| Primary design objective                                         | Maximum fluoride uptake capacity                                              | Controlled fluoride immobilization and stability                           |
| Dominant fluoride removal mechanism                              | Rapid Ca <sup>2+</sup> -F <sup>-</sup> precipitation and surface complexation | Hydroxyl–fluoride ion exchange and inner-sphere complexation               |
| Maximum adsorption capacity (mg F <sup>-</sup> g <sup>-1</sup> ) | > 40                                                                          | < 6 (≈ 4–5.7 depending on conditions)                                      |
| BET surface area (m <sup>2</sup> g <sup>-1</sup> )               | 82.249 m <sup>2</sup> g <sup>-1</sup> (high surface area)                     | Reduced (43.2 m <sup>2</sup> g <sup>-1</sup> ) due to HAp pore filling     |
| Surface alkalinity / pH <sub>pzc</sub>                           | Very high, strongly alkaline (12.6)                                           | High pH <sub>pzc</sub> (10.56) but chemically buffered                     |
| Calcium mobility / leaching tendency                             | High (free CaO dissolution i.e., 1430 mg L <sup>-1</sup> )                    | Moderate, localized Ca <sup>2+</sup> release (1043.17 mg L <sup>-1</sup> ) |
| Nature of fluoride binding                                       | Largely precipitation-driven, partially reversible                            | Chemisorptive, lattice-level incorporation (fluorapatite-like)             |
| Regeneration behavior                                            | Higher short-term capacity recovery                                           | Limited regeneration due to irreversible chemisorption                     |
| Long-term fluoride stability                                     | Moderate (risk of secondary release)                                          | High (permanent fluoride fixation)                                         |

| Parameter                      | AAC-P@Ca (Akorley et al., 2026 <sup>(1)</sup> )  | AAC-P@HAp (This study)                                      |
|--------------------------------|--------------------------------------------------|-------------------------------------------------------------|
| Structural integrity           | Highly reactive, less chemically buffered        | Structurally stabilized composite                           |
| Handling and deployability     | High reactivity, alkalinity concerns             | Safer handling, reduced CaO reactivity                      |
| Sustainability aspect          | Waste-derived but CaO-reactive                   | Fully waste-derived, chemically stabilized                  |
| Preferred application scenario | Capacity-driven treatment where uptake dominates | Long-term, secure fluoride sequestration and immobilization |

## Statistical Evaluation of Process Parameters (Box-Behnken design)

### S1.1 Experimental Design and Model Development

A three-factor, three-level Box-Behnken design (BBD) was employed to evaluate the combined influence of adsorbent dose (A), temperature (B), and solution pH (C) on fluoride removal efficiency using AAC-P@HAp. The experimental domain was defined based on preliminary screening experiments. A total of 15 experimental runs were performed, and the response variable was fluoride removal efficiency (%).

The experimental data were fitted to a second-order quadratic model in coded variables:

$$Y(\%) = 83.3333 + 0.25A - 1.75B - 13.5C - 1.0AB + 1.5AC - 2.0BC + 0.5833A^2 + 0.58 \text{ Eqn 1}$$

### S1.2 Analysis of Variance (ANOVA)

The ANOVA results for the quadratic model are summarized in Table S2. The overall model is statistically significant ( $p < 0.001$ ), while the lack-of-fit is not significant ( $p = 0.4381$ ), indicating acceptable model adequacy within the investigated design space.

Among the tested variables, solution pH (C) exerts a dominant influence on fluoride removal ( $p \ll 0.05$ ), whereas adsorbent dose (A), temperature (B), and interaction terms are statistically insignificant within the explored domain.

**Table S2. ANOVA for the quadratic model describing fluoride removal efficiency (%)**

| Source          | Sum of Squares | df | Mean Square | F-value  | p-value                  | Remark          |
|-----------------|----------------|----|-------------|----------|--------------------------|-----------------|
| Model           | 1549.2963      | 9  | 172.1440    | 19.9985  | $2.3560 \times 10^{-7}$  | Significant     |
| A – Dose        | 0.5000         | 1  | 0.5000      | 0.0581   | 0.8124                   | Not significant |
| B – Temperature | 24.5000        | 1  | 24.5000     | 2.8462   | 0.1098                   | Not significant |
| C – pH          | 1458.0000      | 1  | 1458.0000   | 169.3804 | $2.8790 \times 10^{-10}$ | Significant     |
| AB              | 4.0000         | 1  | 4.0000      | 0.4647   | 0.5046                   | Not significant |
| AC              | 9.0000         | 1  | 9.0000      | 1.0456   | 0.3209                   | Not significant |
| BC              | 16.0000        | 1  | 16.0000     | 1.8588   | 0.1906                   | Not significant |
| A <sup>2</sup>  | 1.6667         | 1  | 1.6667      | 0.1936   | 0.6655                   | Not significant |
| B <sup>2</sup>  | 1.6667         | 1  | 1.6667      | 0.1936   | 0.6655                   | Not significant |
| C <sup>2</sup>  | 21.2585        | 1  | 21.2585     | 2.4697   | 0.1345                   | Not significant |
| Residual        | 146.3333       | 17 | 8.6078      | —        | —                        | —               |
| Lack of Fit     | 25.0000        | 3  | 8.3333      | 0.9615   | 0.4381                   | Not significant |
| Pure Error      | 121.3333       | 14 | 8.6667      | —        | —                        | —               |
| Cor Total       | 1695.6296      | 26 | —           | —        | —                        | —               |

**Table S3: The Model performance statistics:**

|                          |         |
|--------------------------|---------|
| Standard deviation       | 2.9339  |
| Mean response            | 84.2963 |
| C.V. (%)                 | 3.4805  |
| R <sup>2</sup>           | 0.9137  |
| Adjusted R <sup>2</sup>  | 0.8680  |
| Predicted R <sup>2</sup> | 0.6820  |
| Adeq Precision           | 17.9219 |

Although the Predicted R<sup>2</sup> is lower than the Adjusted R<sup>2</sup>, the difference remains within acceptable limits (< 0.2), indicating reasonable predictive capability within the experimental range.

### S1.3 Interpretation of Response Surface Trends

Response surface and contour plots (Figure S1a–b) show that fluoride removal efficiency varies within a relatively narrow range ( $\approx 83\text{--}87\%$ ) across the investigated factor space. This limited variation indicates that the system is relatively robust to changes in adsorbent dose and temperature under the tested conditions.

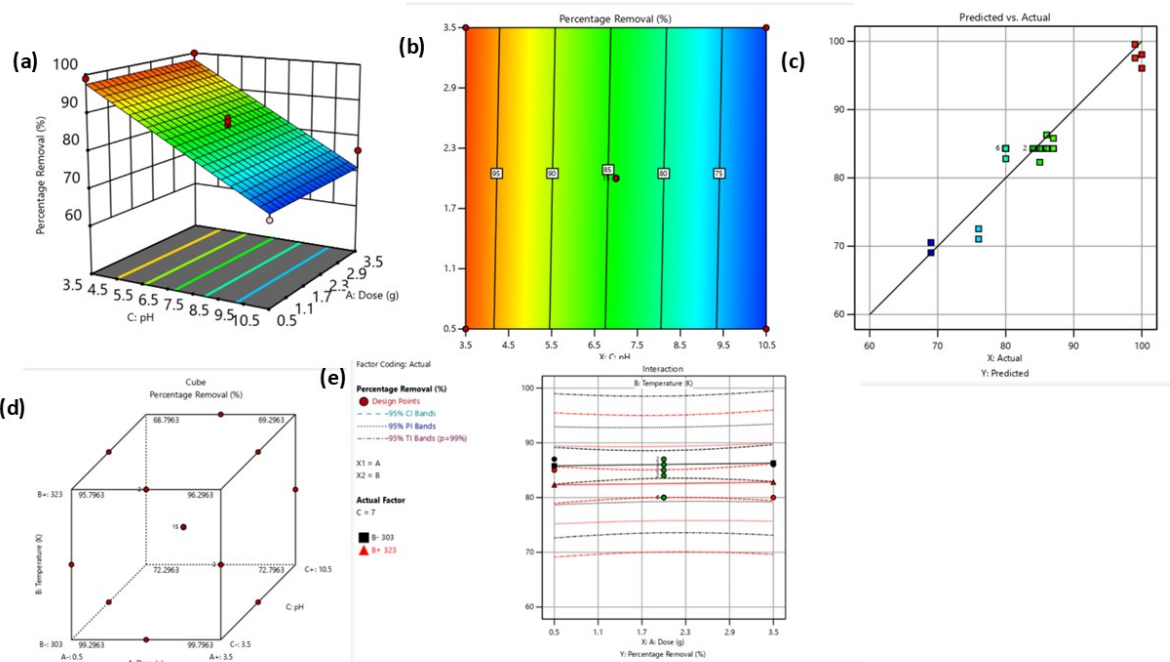

**Figure S1:** a) 3D Surface plot showing the interactive effect of adsorbent dose (A), temperature, (B) and pH (C) on fluoride removal efficiency using AAC-P@HAp adsorbent material, b) 2D contour plot showing the interactive effect of adsorbent dose (A), temperature, (B) and pH (C) on fluoride removal efficiency using AAC-P@HAp adsorbent material, c) Predicted versus actual plot of the optimization process, d) Cube plot showing the interactive effect of adsorbent dose (A), temperature, (B) and pH (C) on fluoride removal efficiency using AAC-P@HAp adsorbent material, e) interaction plot of the optimization process.

The response surfaces clearly demonstrate that decreasing pH enhances fluoride removal, consistent with the surface charge behavior and chemisorption mechanism discussed in the main manuscript. In contrast, dose and temperature produce comparatively minor changes in response.

The cube plot (Figure S1d) and interaction plot (Figure S1e) further confirm that interaction effects are weak and statistically insignificant.

#### S1.4 Model Adequacy and Practical Implications

The quadratic model provides a statistically valid representation of the system within the defined experimental domain. However, the narrow response window suggests that the adsorption process is governed primarily by surface chemistry (particularly pH-dependent mechanisms) rather than strong multivariate interactions.

Accordingly, the statistical design serves to confirm parameter hierarchy and system robustness rather than to identify a sharply defined global optimum.

**Table S4. Estimated regression coefficients for fluoride removal efficiency (%)**

| Term            | Coefficient | df | SE     | 95% CI (Low) | 95% CI (High) |
|-----------------|-------------|----|--------|--------------|---------------|
| Intercept       | 83.3333     | 1  | 0.7575 | 81.7351      | 84.9316       |
| A – Dose        | 0.2500      | 1  | 1.0373 | -1.9385      | 2.4385        |
| B – Temperature | -1.7500     | 1  | 1.0373 | -3.9385      | 0.4385        |
| C – pH          | -13.5000    | 1  | 1.0373 | -15.6885     | -11.3115      |
| AB              | -1.0000     | 1  | 1.4670 | -4.0950      | 2.0950        |
| AC              | 1.5000      | 1  | 1.4670 | -1.5950      | 4.5950        |
| BC              | -2.0000     | 1  | 1.4670 | -5.0950      | 1.0950        |
| A <sup>2</sup>  | 0.5833      | 1  | 1.3257 | -2.2136      | 3.3803        |
| B <sup>2</sup>  | 0.5833      | 1  | 1.3257 | -2.2136      | 3.3803        |
| C <sup>2</sup>  | 2.0833      | 1  | 1.3257 | -0.7136      | 4.8803        |
